**Peng, X. M., Tehranian, R., Dietrich, P., Stefanis, L. and Perez, R. G.** (2005).  $\alpha$ -Synuclein activation of protein phosphatase 2A reduces tyrosine hydroxylase phosphorylation in dopaminergic cells. *J. Cell Sci.* **118**, 3523-3530.

In both the print and online versions of this paper, the first author's name included an incorrect middle initial. The correct name is given below.

Xiangmin Peng, Roya Tehranian, Paula Dietrich, Leonidas Stefanis and Ruth G. Perez

In addition, the second sentence of the Introduction was edited incorrectly so as to change the intended meaning. The correct text is shown below.

Knowledge about  $\alpha$ -Syn is expanding and it is likely to have a chaperone function given its homology to the chaperone protein 14-3-3 (Ostrerova et al., 1999), which binds to and regulates the activity of many cellular proteins.

We apologize to the authors and readers for these errors.
